# Supplementary material for: Worldwide post‐marketing safety surveillance experience with tofacitinib in ulcerative colitis
Source: PubMed Central journal article supplement — Aliment Pharmacol Ther. 2021 Oct 9;55(3):302–10. doi: 10.1111/apt.16619 (PMC9293472; doi:10.1111/apt.16619), 2021-10-09
Supplement: APT-55-302-s001.pdf [file APT-55-302-s001.pdf]

**Supplementary Table 1.** Overall AEs and SAEs by MedDRA System Organ Class by tofacitinib formulation

|                                                      | Tofacitinib immediate-release |                                |                | Tofacitinib extended-release |                                |                |
|------------------------------------------------------|-------------------------------|--------------------------------|----------------|------------------------------|--------------------------------|----------------|
|                                                      | Number of AEs                 | Number of cases with an AE (%) | Number of SAEs | Number of AEs                | Number of cases with an AE (%) | Number of SAEs |
|                                                      | (N = 11,184)                  | (N = 3616)                     | (N = 1685)     | (N = 228)                    | (N = 98)                       | (N = 41)       |
| General disorders and administration site conditions | 2949                          | 1964 (54.3)                    | 215            | 59                           | 40 (40.8)                      | 2              |
| Gastrointestinal disorders                           | 1922                          | 1063 (29.4)                    | 584            | 37                           | 20 (20.4)                      | 19             |
| Injury, poisoning, and procedural complications      | 1372                          | 1055 (29.2)                    | 48             | 58                           | 44 (44.9)                      | 6              |
| Infections and infestations                          | 818                           | 604 (16.7)                     | 251            | 16                           | 13 (13.3)                      | 6              |
| Investigations                                       | 776                           | 536 (14.8)                     | 66             | 11                           | 9 (9.2)                        | -              |
| Nervous system disorders                             | 633                           | 512 (14.2)                     | 65             | 6                            | 6 (6.1)                        | 1              |
| Psychiatric disorders                                | 477                           | 383 (10.6)                     | 16             | 8                            | 5 (5.1)                        | 1              |
| Skin and subcutaneous tissue disorders               | 485                           | 353 (9.8)                      | 20             | 5                            | 4 (4.1)                        | -              |
| Musculoskeletal and connective tissue disorders      | 478                           | 337 (9.3)                      | 40             | 9                            | 7 (7.1)                        | -              |
| Respiratory, thoracic, and mediastinal disorders     | 450                           | 313 (8.7)                      | 61             | 8                            | 6 (6.1)                        | 1              |
| Vascular disorders                                   | 154                           | 140 (3.9)                      | 105            | 3                            | 3 (3.1)                        | 3              |
| Metabolism and nutrition disorders                   | 112                           | 108 (3.0)                      | 11             | -                            | -                              | -              |
| Renal and urinary disorders                          | 98                            | 85 (2.4)                       | 26             | 1                            | 1 (1.0)                        | -              |
| Blood and lymphatic system disorders                 | 69                            | 65 (1.8)                       | 16             | 2                            | 2 (2.0)                        | 1              |
| Eye disorders                                        | 78                            | 63 (1.7)                       | 24             | 1                            | 1 (1.0)                        | -              |
| Immune system disorders                              | 64                            | 62 (1.7)                       | 17             | -                            | -                              | -              |
| Cardiac disorders                                    | 65                            | 49 (1.4)                       | 45             | 1                            | 1 (1.0)                        | -              |
| Neoplasms benign, malignant, and unspecified         | 45                            | 41 (1.1)                       | 39             | 1                            | 1 (1.0)                        | 1              |

MedDRA System Organ Classes with <1% of AEs are not shown.

AE, adverse event; MedDRA, Medical Dictionary for Regulatory Activities; N, total number of cases/events; SAE, serious adverse event.
